# Supplementary material for: DentVLM: A Multimodal Vision-Language Model for Comprehensive Dental Diagnosis and Enhanced Clinical Practice
Source: Research Square preprint supplement (doi:10.21203/rs.3.rs-7403627/v1), 2025-09-03
Supplement: Supplementary file 1 [file score_output_en.xlsx]

## Sheet: answer.json
Category	Type	Disease	Value
hit_rate	Types of Malocclusion		0.5
hit_rate	Facial Profile		0.25
area_iou	Caries		0
area_iou	Periodontal Disease		0.333333
area_iou	Wedge-shaped Defect		0
area_iou	Demineralization		0.625
area_iou	Soft Deposit		0
area_iou	Tooth Wear		0
area_iou	Impacted Tooth		0.333333
area_iou	Prosthetic Crown		0
area_iou	Root Canal Therapy		0
area_iou	Fillings		0.625
area_iou	Prosthetic Bridge		0
area_iou	Apical Periodontitis		0
area_iou	Residual Root		0
area_iou	Implant		0
area_iou	Residual Crown		0
area_iou	Insufficient Space for Primary Tooth Eruption		0.75
area_iou	Calculus		0
area_iou	average		0.156863
acc	mal	Angle's Classification	1
acc	mal	Skeletal Classification	1
acc	mal	Dental Crowding	0.5
acc	mal	Dental Spacing	1
acc	mal	Deep Overbite	0.5
acc	mal	Deep Overjet	1
acc	mal	Open Bite	1
acc	mal	Dental Protrusion	1
acc	mal	Maxillary Protrusion	1
acc	mal	Maxillary Hypoplasia	1
acc	mal	Mandibular Protrusion	1
acc	mal	Mandibular Retrognathism	0.5
acc	mal	Anterior Crossbite	1
acc	mal	Posterior Scissor Bite	1
acc	mal	Posterior Crossbite	1
acc	mal	Midline Deviation	0.5
acc	mal	Sagittal Relationship	1
acc	mal	average	0.882353
acc	dis	Caries	0.5
acc	dis	Periodontal Disease	0.5
acc	dis	Wedge-shaped Defect	1
acc	dis	Demineralization	1
acc	dis	Soft Deposit	0.5
acc	dis	Tooth Wear	1
acc	dis	Impacted Tooth	1
acc	dis	Prosthetic Crown	1
acc	dis	Root Canal Therapy	1
acc	dis	Fillings	1
acc	dis	Prosthetic Bridge	0.5
acc	dis	Apical Periodontitis	0.5
acc	dis	Residual Root	1
acc	dis	Implant	1
acc	dis	Residual Crown	0.5
acc	dis	Insufficient Space for Primary Tooth Eruption	1
acc	dis	Calculus	1
acc	dis	average	0.823529
